# Supplementary material for: Study on NGF and VEGF during the Equine Perinatal Period—Part 1: Healthy Foals Born from Normal Pregnancy and Parturition
Source: MDPI journal article supplement (doi:10.3390/vetsci9090451), 2022-08-23
Supplement: s1 [file s1]

**Table S1.** Foals complete blood cell counts, serum biochemistry, electrolyte concentrations and rapid determinations at birth. Data are expressed as mean  $\pm$  standard deviation (min-max). For normal values refer to [27–30].

| Haematology                                                    |                             |                                     |                                  |                                   |                                    |                                 |                                    |                         |                             |
|----------------------------------------------------------------|-----------------------------|-------------------------------------|----------------------------------|-----------------------------------|------------------------------------|---------------------------------|------------------------------------|-------------------------|-----------------------------|
| Haemoglobin<br>g/dL                                            | Haematocrit<br>%            | Erythrocytes<br>10 <sup>6</sup> /μL | Platelets<br>10 <sup>3</sup> /μL | Leucocytes<br>10 <sup>3</sup> /μL | Lymphocytes<br>10 <sup>3</sup> /μL | Monocytes<br>cells/μL           | Neutrophils<br>10 <sup>3</sup> /μL | Eosinophils<br>cells/μL | Basophils<br>cells/μL       |
| 16.0 ±0.8<br>(14.5-17.6)                                       | 48.3 ±2.1<br>(44.8-52.0)    | 11.2 ±0.6<br>(10.4-12.1)            | 197.8 ±39.8<br>(134-274)         | 8.3 ±1.1<br>(6.4-10.3)            | 1.4 ±0.4<br>(1.1-2.4)              | 218.6 ±71.6<br>(80-340)         | 6.6 ±1.0<br>(4.9-8.1)              | 15.7 ±12.2<br>(0-40)    | 82.9 ±153.4<br>(10-610)     |
| Normal haematology values in one day old foals [27]:           |                             |                                     |                                  |                                   |                                    |                                 |                                    |                         |                             |
| 12.0-16.6                                                      | 32-46                       | 8.2-11.0                            | 129-409                          | 4.9-11.7                          | 0.7-2.1                            | 70-390                          | 3.4-9.6                            | 0-20                    | 0-30                        |
| Serum biochemistry                                             |                             |                                     |                                  |                                   |                                    |                                 |                                    |                         |                             |
| Creatine<br>kinase<br>IU/L                                     | Total<br>bilirubin<br>mg/dL | Triglycerides<br>mg/dL              | Total protein<br>g/dL            | Albumin<br>g/dL                   | Albumin /<br>Globulin              | Blood urea<br>nitrogen<br>mg/dL | Creatinine<br>mg/dL                | Fibrinogen<br>g/L       | Serum<br>amyloid A<br>μg/dL |
| 232 ±93<br>(102-370)                                           | 2.4 ±0.8<br>(1.6-4.6)       | 11.1 ±6.3<br>(2-24)                 | 4.1 ±0.2<br>(3.8-4.7)            | 3.3 ±0.3<br>(2.8-3.8)             | 4.3 ±1.2<br>(2.9-7.0)              | 35.2 ±4.7<br>(28.0-42.4)        | 2.6 ±0.4<br>(1.9-3.5)              | 1.6 ±0.2<br>(1.4-2.0)   | 7.9 ±7.0<br>(1-23)          |
| Normal serum biochemistry values in one day old foals [28,29]: |                             |                                     |                                  |                                   |                                    |                                 |                                    |                         |                             |
| 40-909                                                         | 1.3-4.5                     | 30-193                              | 4.3-8.1                          | 2.5-3.6                           |                                    | 9-40                            | 1.2-4.3                            | 1-4                     | 0-37                        |
| Electrolyte concentrations                                     |                             |                                     |                                  |                                   |                                    |                                 |                                    |                         |                             |
| Phosphorus<br>mg/dL                                            | Calcium<br>mg/dL            |                                     | Sodium<br>mg/dL                  | Potassium<br>mg/dL                |                                    | Chlorine<br>mg/dL               | Magnesium<br>mg/dL                 |                         |                             |
| 5.6 ±0.8<br>(4.1-6.9)                                          | 13.0 ±0.5<br>(12.3-14.2)    |                                     | 142.5 ±1.6<br>(140-145)          | 4.7 ±1.6<br>(4.0-5.7)             |                                    | 101.7 ±2.7<br>(96.9-104.9)      | 1.9 ±2.1<br>(1.7-2.1)              |                         |                             |
| Normal electrolyte concentrations in one day old foals [28]:   |                             |                                     |                                  |                                   |                                    |                                 |                                    |                         |                             |
| 3.8-7.4                                                        | 9.7-13.7                    |                                     | 123-159                          | 3.6-5.6                           |                                    | 90-114                          | 0.6-4.2                            |                         |                             |
| Rapid determinations                                           |                             |                                     |                                  |                                   |                                    |                                 |                                    |                         |                             |
| Jugular vein glucose<br>mg/dL                                  |                             |                                     |                                  | Umbilical vein lactate<br>mmol/L  |                                    |                                 | Jugular vein lactate<br>mmol/L     |                         |                             |
| 90.6 ±20.1<br>(51-127)                                         |                             |                                     |                                  | 4.3 ±3.9<br>(0.5-15.1)            |                                    |                                 | 3.6 ±2.1<br>(0.5-8.5)              |                         |                             |
| Normal determinations in foals at birth [28,30]:               |                             |                                     |                                  |                                   |                                    |                                 |                                    |                         |                             |
| 67-99                                                          |                             |                                     |                                  | 3.2-4.7                           |                                    |                                 | 2.3-5.0                            |                         |                             |

## References

27. Harvey, J.W. Normal hematological values. In *Equine Clinical Neonatology*; Koterba, A.M., Drummond, W.H., Kosch, P.C., Eds.; Lea and Febiger: Philadelphia, 1990; pp. 561–570.
28. Bauer, J.E.; Harvey, J.W.; Asquith, R.L.; McNulty, P.K.; Kivipelho, J.A.N. Clinical chemistry reference values of foals during the first year of life. *Equine Vet. J.* **1984**, *16*, 361–363.
29. Stoneham, S.J.; Palmer, L.; Cash, R.; Rosedale, P.D. Measurement of serum amyloid A in the neonatal foal using a latex agglutination immunoturbidimetric assay: determination of the normal range, variation with age and response to disease. *Equine Vet. J.* **2001**, *33*, 599–603.
30. Pirrone, A.; Mariella, J.; Gentilini, F.; Castagnetti, C. Amniotic fluid and blood lactate concentrations in mares and foals in the early postpartum period. *Theriogenology* **2012**, *78*, 1182–1189.
